# Supplementary material for: Structure-induced catalytic activity of Co–Zn double-metal cyanide complexes for terpolymerization of propylene oxide, cyclohexene oxide and CO2
Source: Royal Society of Chemistry journal article supplement (doi:10.1039/c5ra00299k), 2015-01-01
Supplement: c5ra00299k1.pdf [file c5ra00299k1.pdf]

## Supporting Information

### **Structure-induced catalytic activity of Co-Zn double-metal cyanide complexes for terpolymerization of propylene oxide, cyclohexene oxide and CO<sub>2</sub>**

Joby Sebastian<sup>†, ‡</sup>, Darbha Srinivas<sup>†, ‡, \*</sup>

<sup>†</sup> Catalysis Division, CSIR-National Chemical Laboratory, Pune-411 008, India.

<sup>‡</sup> Academy of Scientific and Innovative Research (AcSIR), New Delhi- 110 001, India.

E-mail: [d.srinivas@ncl.res.in](mailto:d.srinivas@ncl.res.in), Tel: +91 20 2590 2018, Fax: +91 20 2590 2633.

- 
- S1.** <sup>1</sup>H NMR spectrum of PCHC.
  - S2.** <sup>1</sup>H NMR spectrum of PPC.
  - S3.** <sup>1</sup>H NMR spectra of all polycarbonates.
  - S4.** <sup>13</sup>C inverse gated NMR of the copolymers and terpolymer in the CH and CH<sub>2</sub> regions of PPC.
  - S5.** <sup>13</sup>C inverse gated NMR of the copolymers and terpolymer in the CH<sub>3</sub> region.
  - S6.** Thermograms of PPC, PCHC and terpolymer.
  - S7.** FTIR of Co-Zn DMC catalysts.
  - S8.** DRIFT spectrum of adsorbed pyridine on DMC-II showing bands due to Lewis acid sites..
  - S9.** NH<sub>3</sub>-TPD of DMC-II.
  - S10.** Powder XRD of PCHC and terpolymer produced using DMC-II catalyst.
  - S11.** SEM images of PCHC and terpolymer produced over DMC-II
  - S12.** <sup>1</sup>H NMR spectrum of crude terpolymer synthesised over DMC-II.
  - S13.** Reaction time verses reactor pressure at different reaction conditions.
  - S14.** PXRD patterns of fresh and spent DMC-II catalyst.

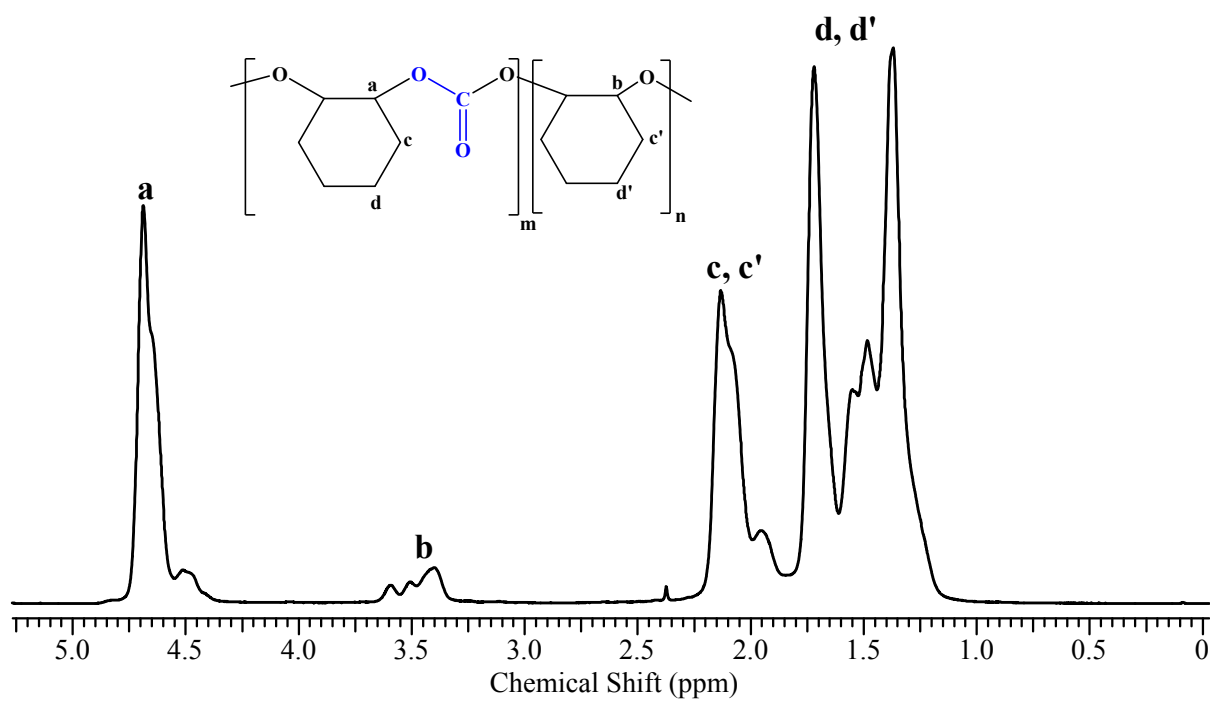

S1.  $^1\text{H}$  NMR spectrum of purified PCHC.

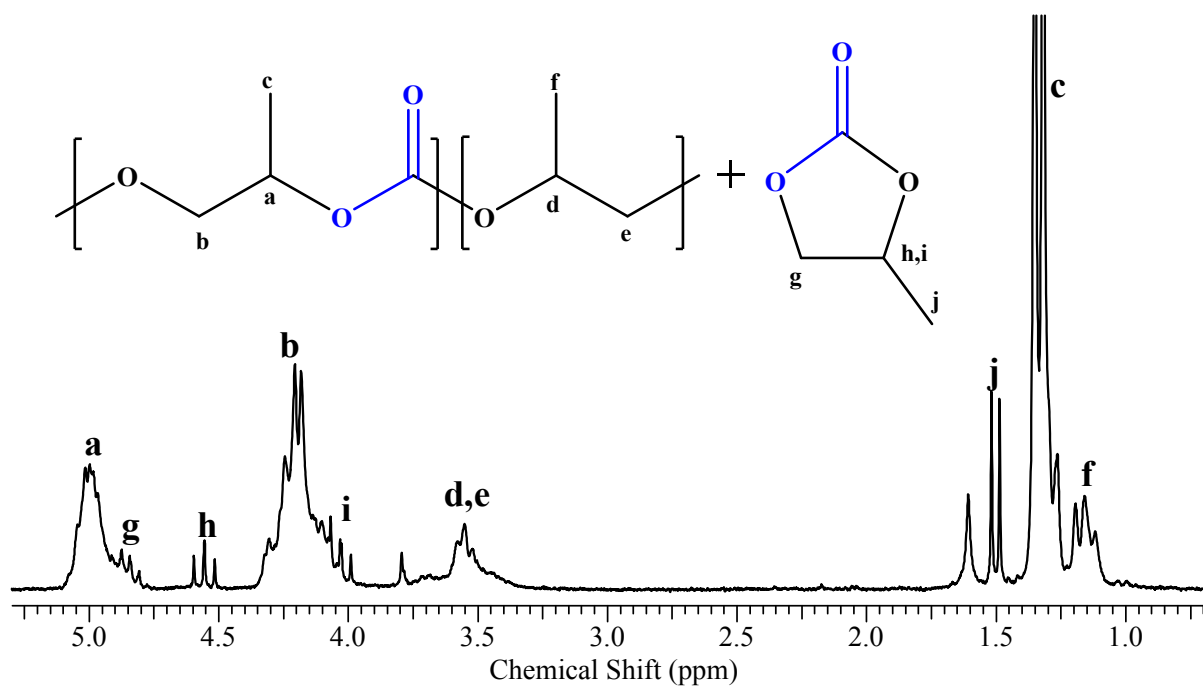

S2.  $^1\text{H}$  NMR spectrum of purified PPC.

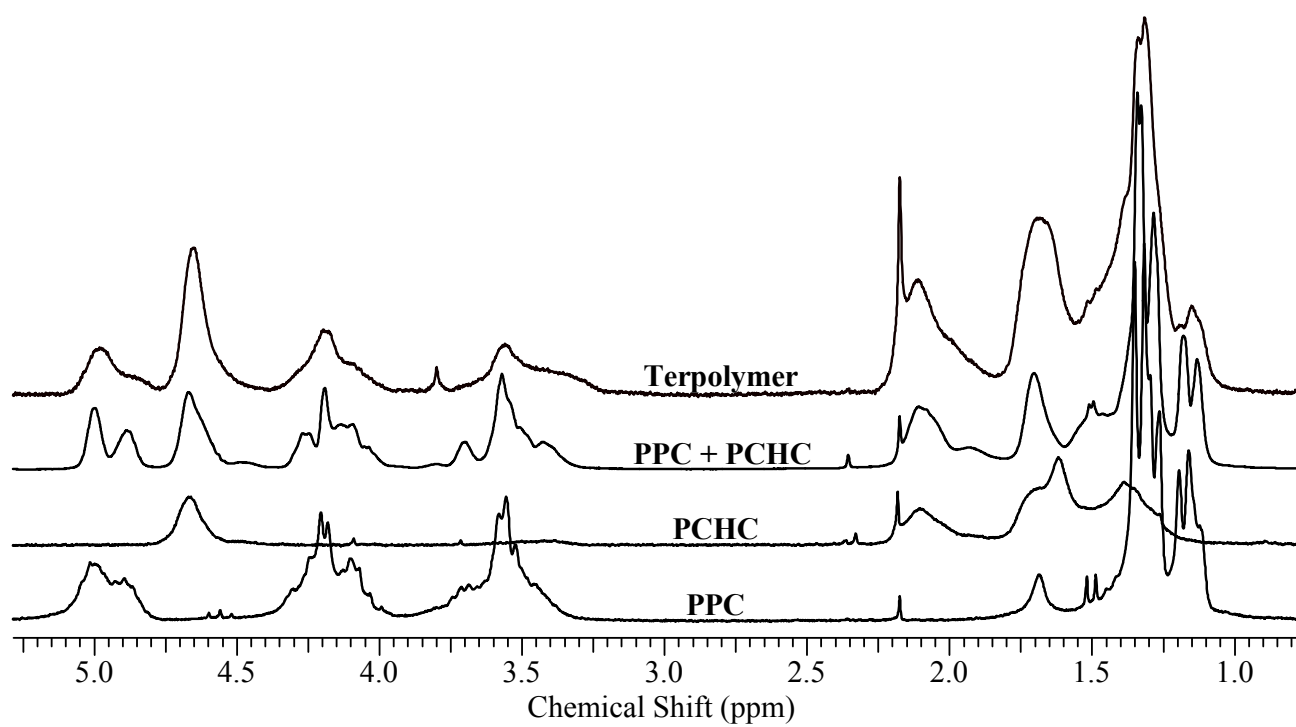

**S3.**  $^1\text{H}$  NMR spectra of PPC, PCHC, PPC + PCHC physical blend and PO-CHO-CO<sub>2</sub> terpolymer.

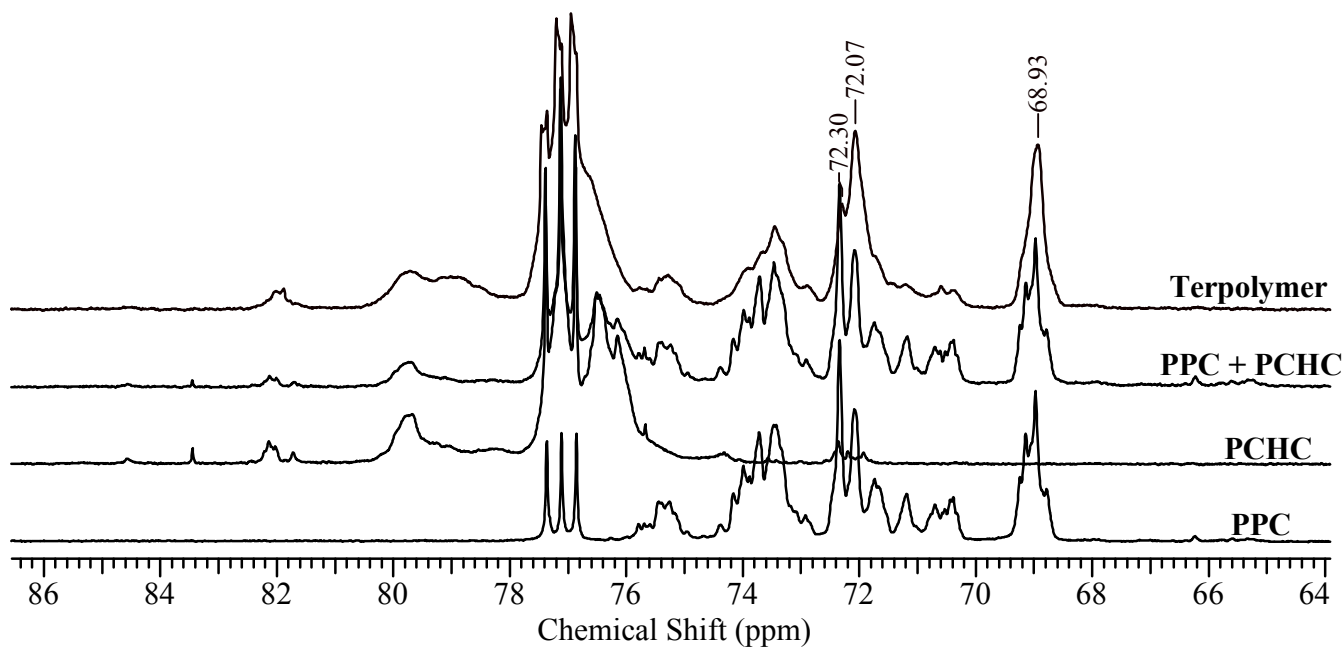

**S4.** Inverse-gated  $^{13}\text{C}$  NMR of the polycarbonates in the CH (72.07 and 72.30 ppm) and  $\text{CH}_2$  (68.93 ppm) regions of PPC. The terpolymer spectrum appeared as broad peaks without considerable splits as in the blend and PPC. It also clear that there is a change in tacticity pattern for the terpolymer as compared to PPC (reversal of intensity distribution of 72.30 ppm in terpolymer as compared to PPC).

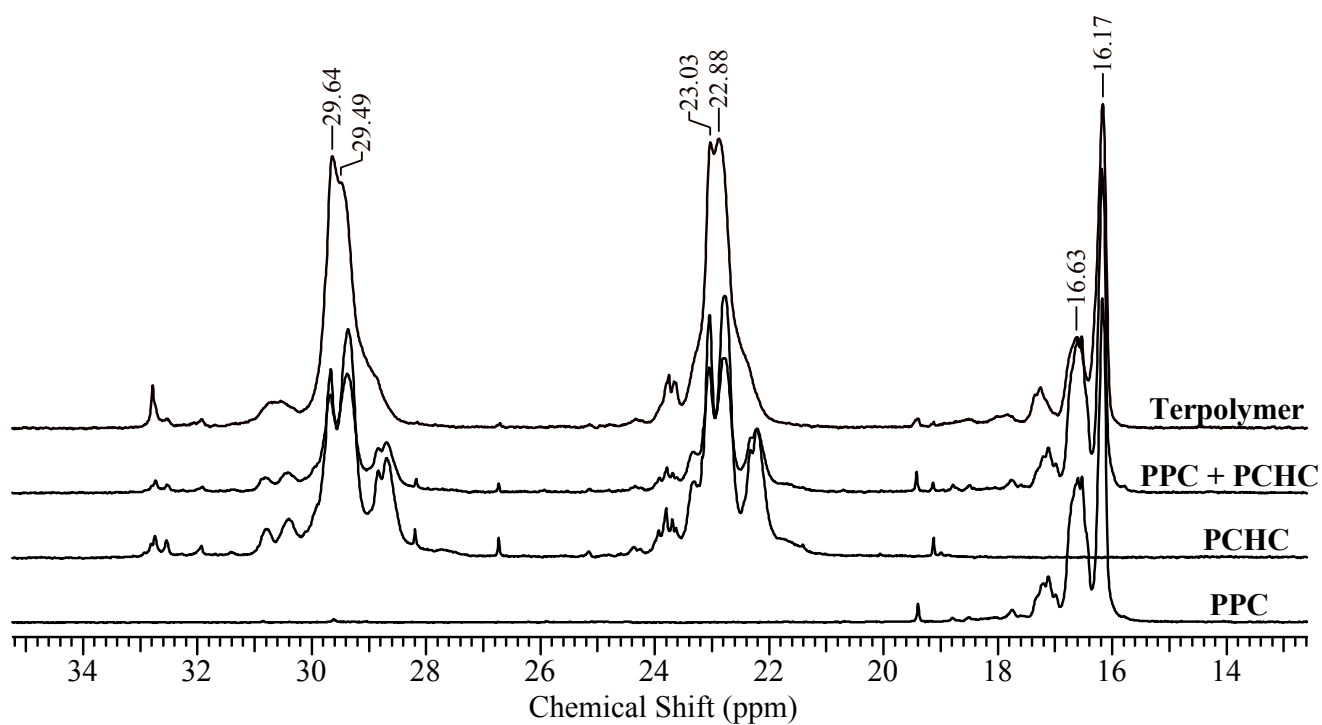

**S5.**  $^{13}\text{C}$  inverse gated NMR of the polycarbonates in the CH<sub>3</sub> region (16.17 and 16.63 ppm) of PPC and CH<sub>2</sub> region (22.8 and 29.64 ppm) of PCHC. No major difference was observed in the CH<sub>3</sub> region of terpolymer as compared to PPC, but the peaks appeared as merged in case of CH<sub>2</sub> regions of terpolymer as compared to PCHC.

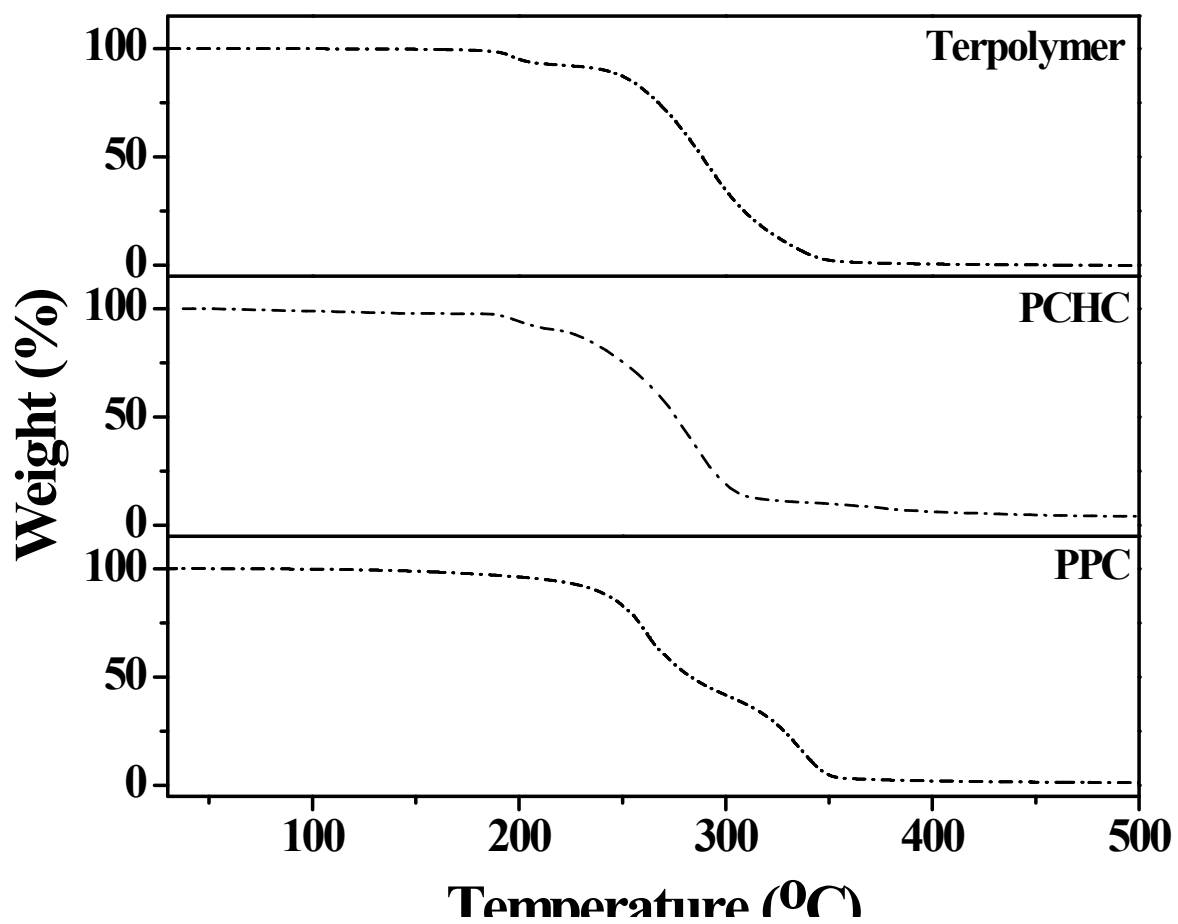

S6. Thermograms of PPC, PCHC and terpolymer synthesized over DMC-II.

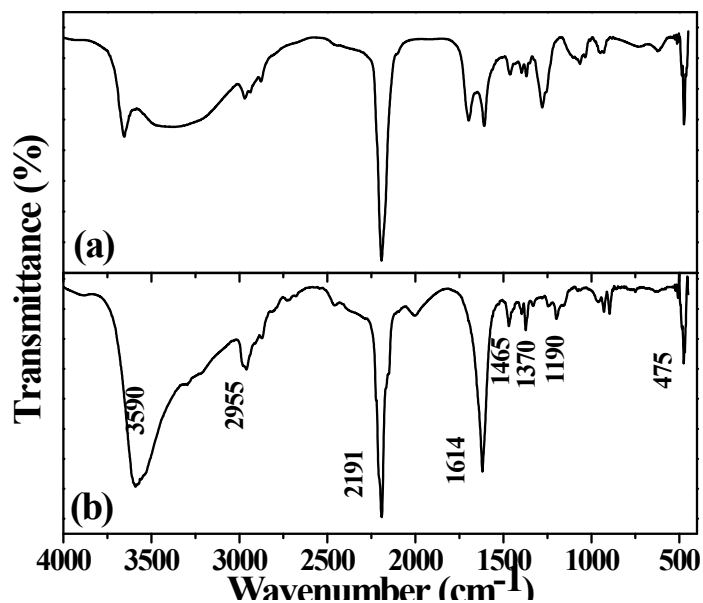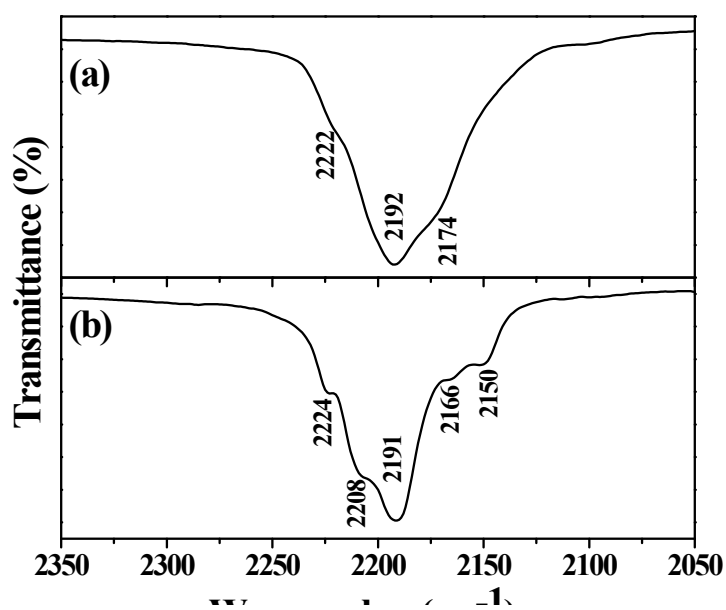

S7. FTIR of (a) DMC-I and (b) DMC-II catalysts. Band assignments are given below.

| Band position (cm <sup>-1</sup> ) | Band assignment                |
|-----------------------------------|--------------------------------|
| 3590                              | -OH stretch                    |
| 2955                              | -C-H stretch                   |
| 2191                              | -CN stretch                    |
| 1614                              | -OH bending (H <sub>2</sub> O) |
| 1465                              | -CH scissoring                 |
| 1370                              | -OH bending (tert-butanol)     |
| 1190                              | 3°-C-O stretch                 |
| 475                               | Co-CN stretch                  |



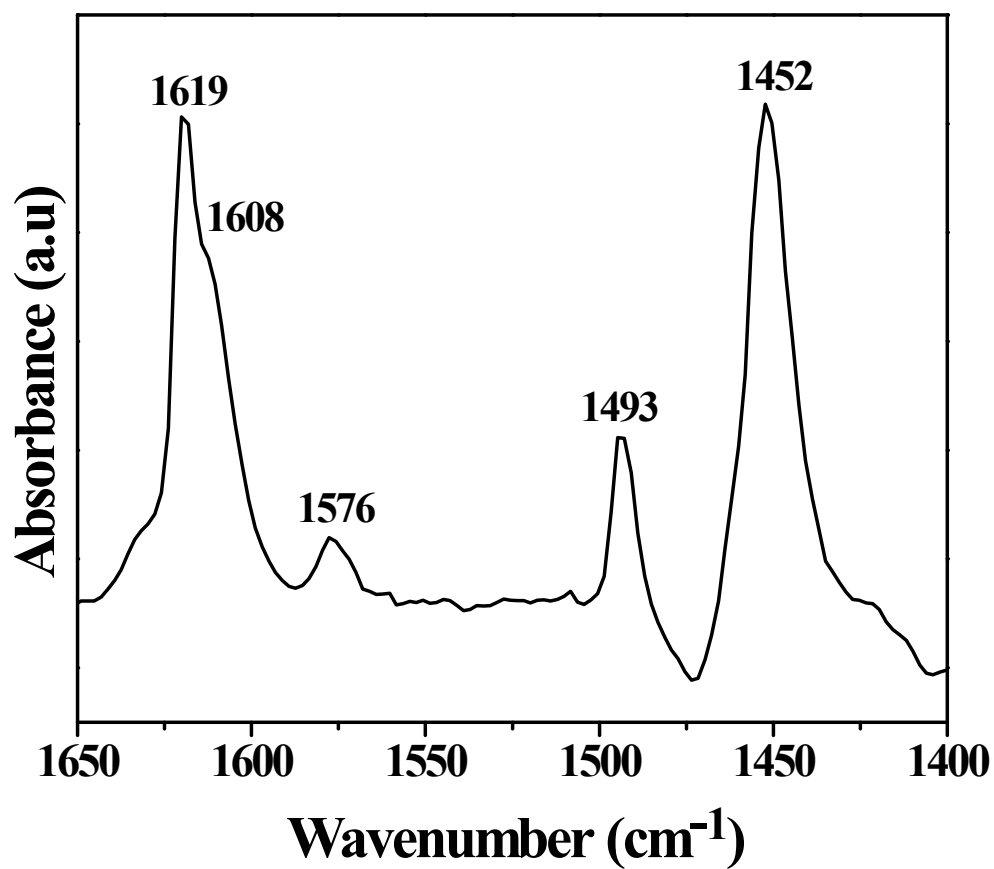

**S8.** DRIFT spectra of adsorbed pyridine on DMC-II showing bands due to Lewis acid sites.

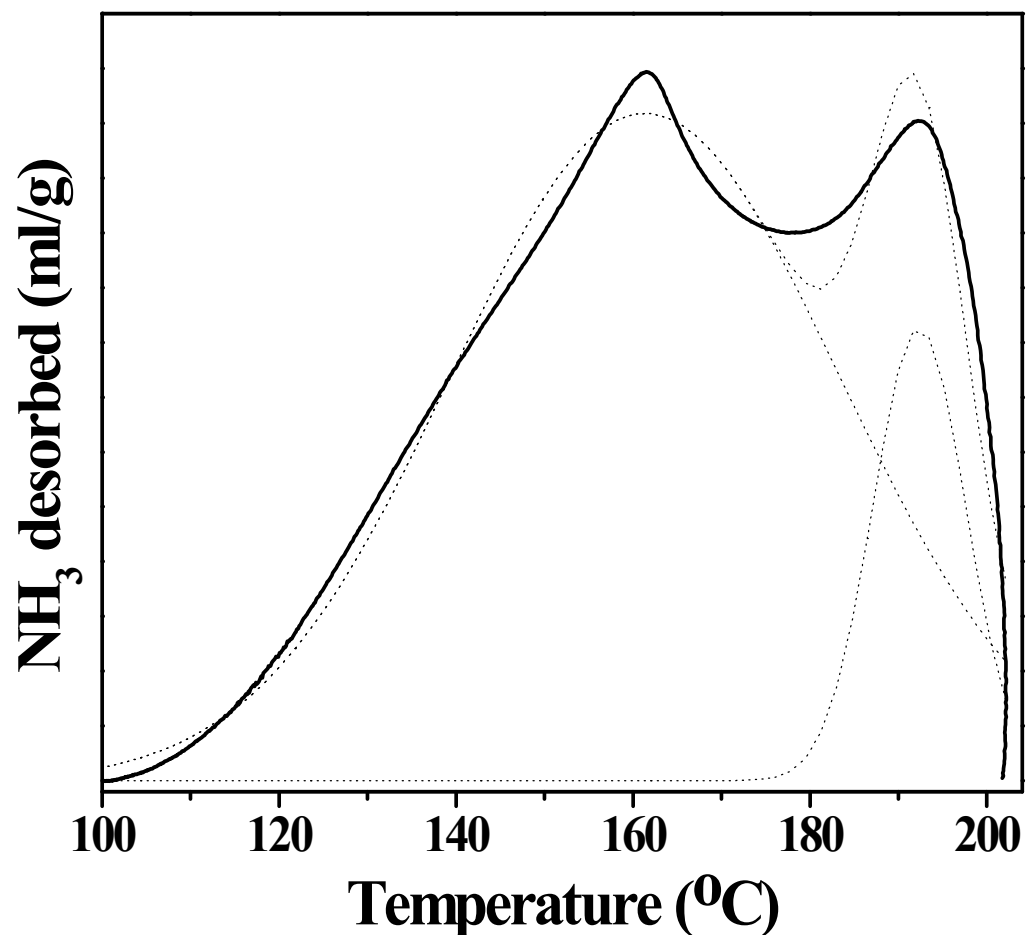

S9. NH<sub>3</sub>-TPD of DMC-II.

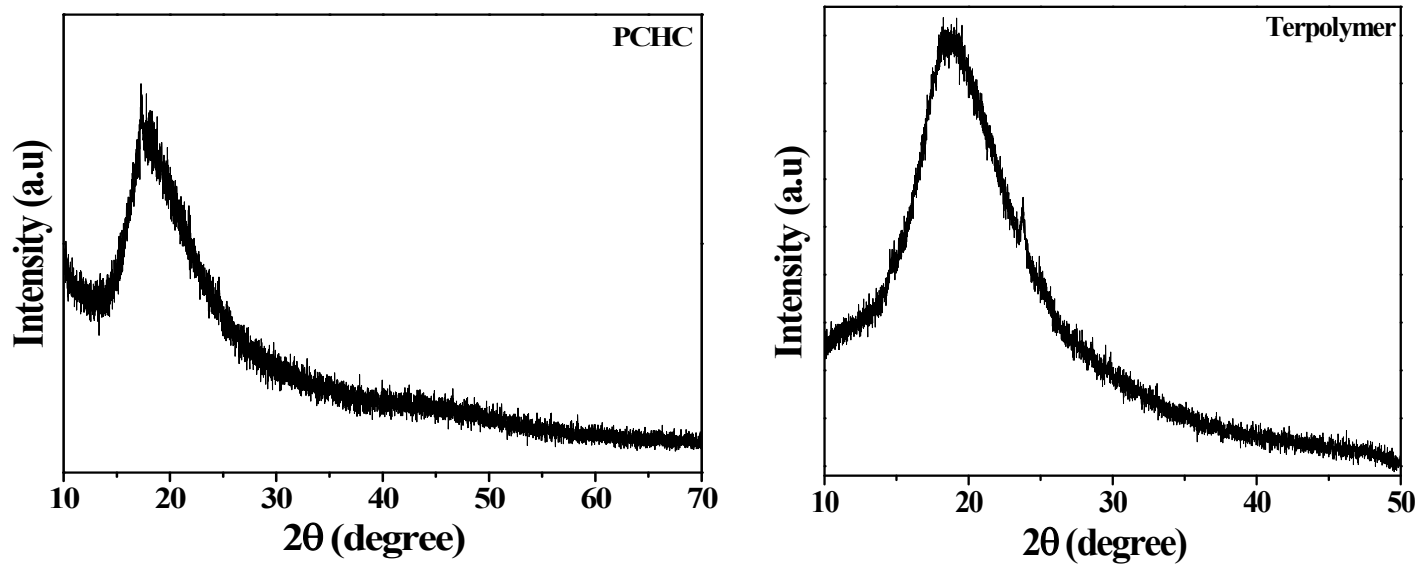

S10. PXRD of PCHC and terpolymer produced using DMC-II catalyst.

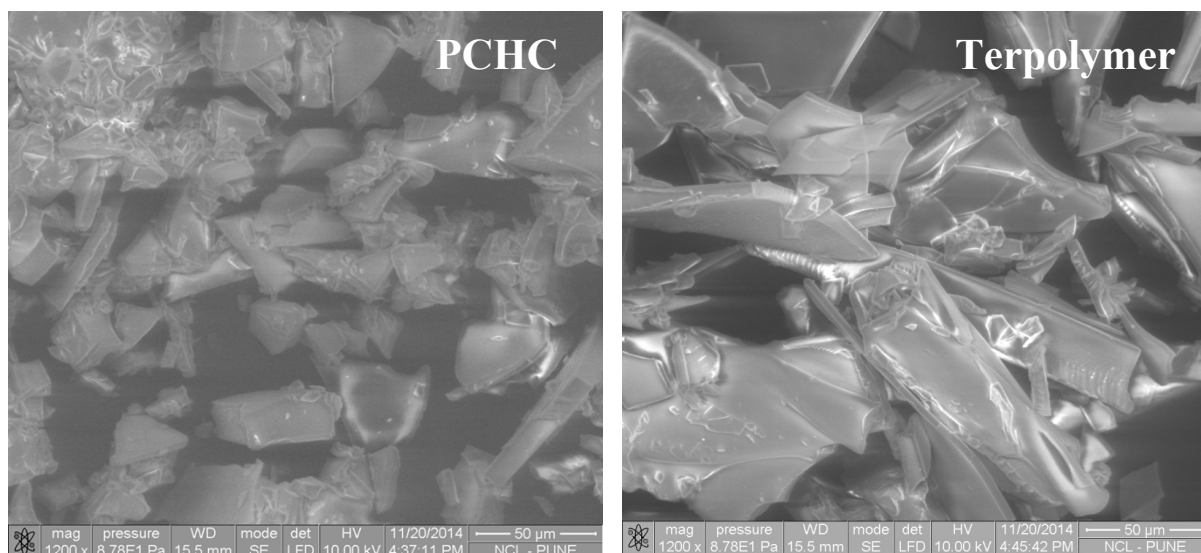

**S11.** SEM images of PCHC and PO-CHO-CO<sub>2</sub> terpolymer produced over DMC-II.

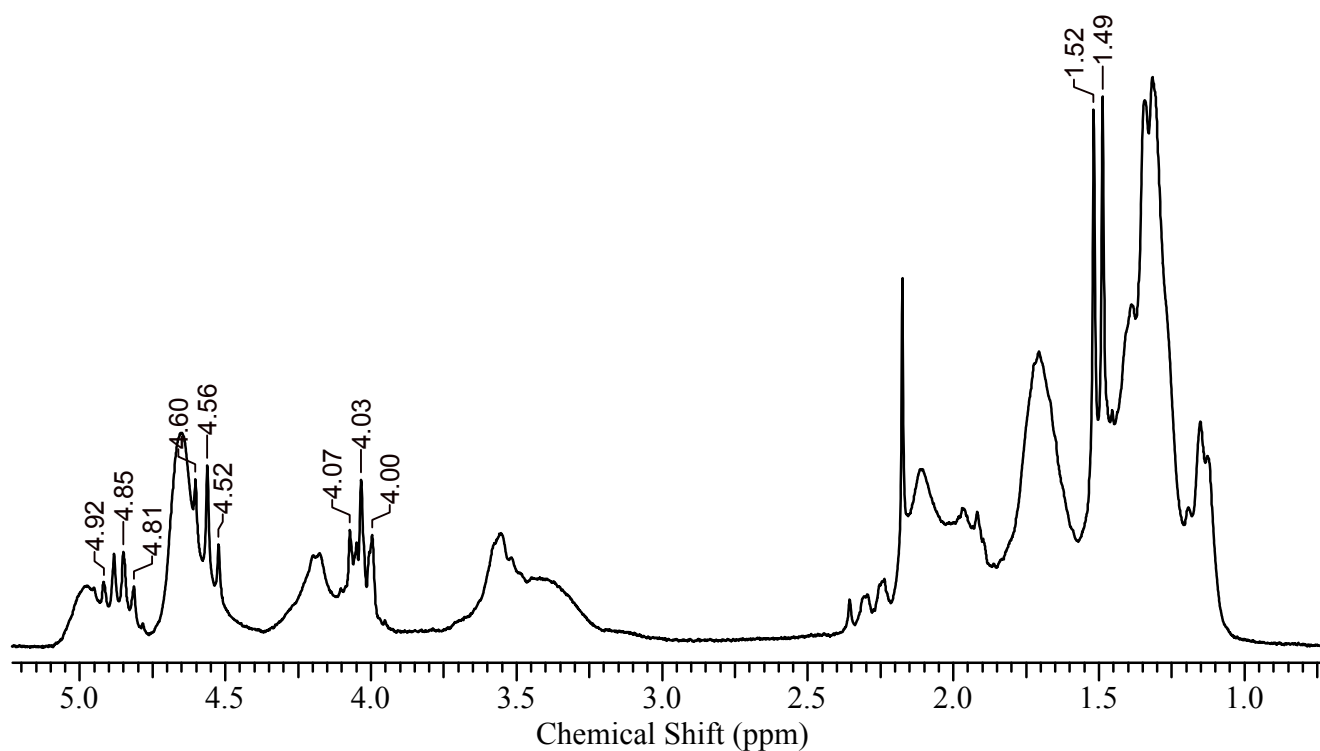

**S12.**  $^1\text{H}$  NMR spectrum of crude terpolymer synthesised over DMC-II. The assigned peaks correspond to cyclic propylene carbonate (PC).

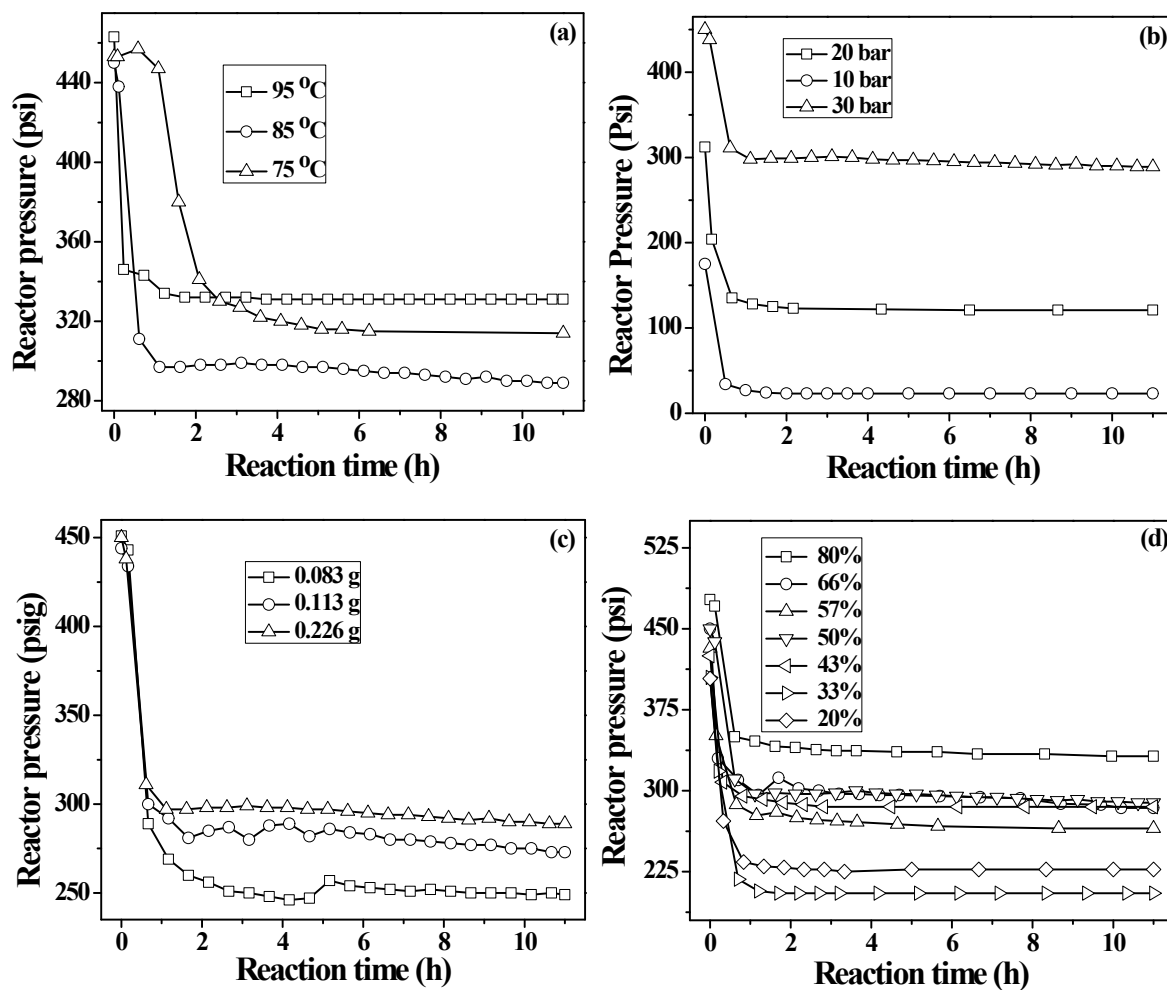

**S13.** Reaction time versus reactor pressure at different reaction conditions using DMC-II as catalyst. (a) effect of temperature, (b) effect of CO<sub>2</sub> pressure, (c) effect of catalyst quantity and (d) effect of % PO in reactant epoxide mixture.

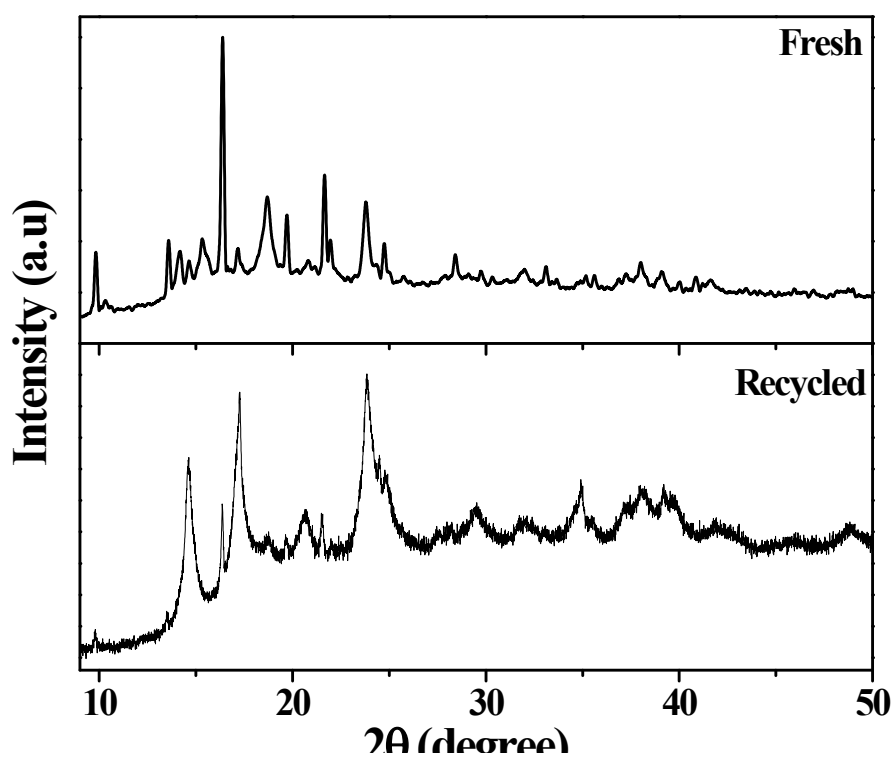

**S14.** PXRD patterns of fresh and spent DMC-II catalyst. Reaction conditions: CHO = 5.6 g, PO = 3.5 g, CHO : PO molar ratio = 1:1, catalyst = 0.226 g, toluene = 8.7 g,  $p_{\text{CO}_2}$  = 30 bar, reaction time = 11 h, reaction temperature = 85°C.
